# Supplementary material for: circMbl functions in cis and in trans to regulate gene expression and physiology in a tissue-specific fashion
Source: PubMed Central journal article supplement — Cell Rep. Author manuscript; Available in PMC 2022 Aug 4. (PMC9352392; doi:10.1016/j.celrep.2022.110740), 2022-04-26
Supplement: NIHMS1801894-supplement-1.pdf [file NIHMS1801894-supplement-1.pdf]

**Supplemental information**

**circMbl functions in *cis* and in *trans* to regulate  
gene expression and physiology  
in a tissue-specific fashion**

**Nagarjuna Reddy Pamudurti, Ines Lucia Patop, Aishwarya Krishnamoorthy, Osnat Bartok, Roni Maya, Noam Lerner, Reut Ashwall-Fluss, Jacob Vinay Vikas Konakondla, Tsevi Beatus, and Sebastian Kadener**

Cell Reports, Volume 39

## Supplemental information

**circMbl functions in *cis* and in *trans* to regulate  
gene expression and physiology  
in a tissue-specific fashion**

**Nagarjuna Reddy Pamudurti, Ines Lucia Patop, Aishwarya Krishnamoorthy, Osnat Bartok, Roni Maya, Noam Lerner, Reut Ashwall-Fluss, Jacob Vinay Vikas Konakondla, Tsevi Beatus, and Sebastian Kadener**

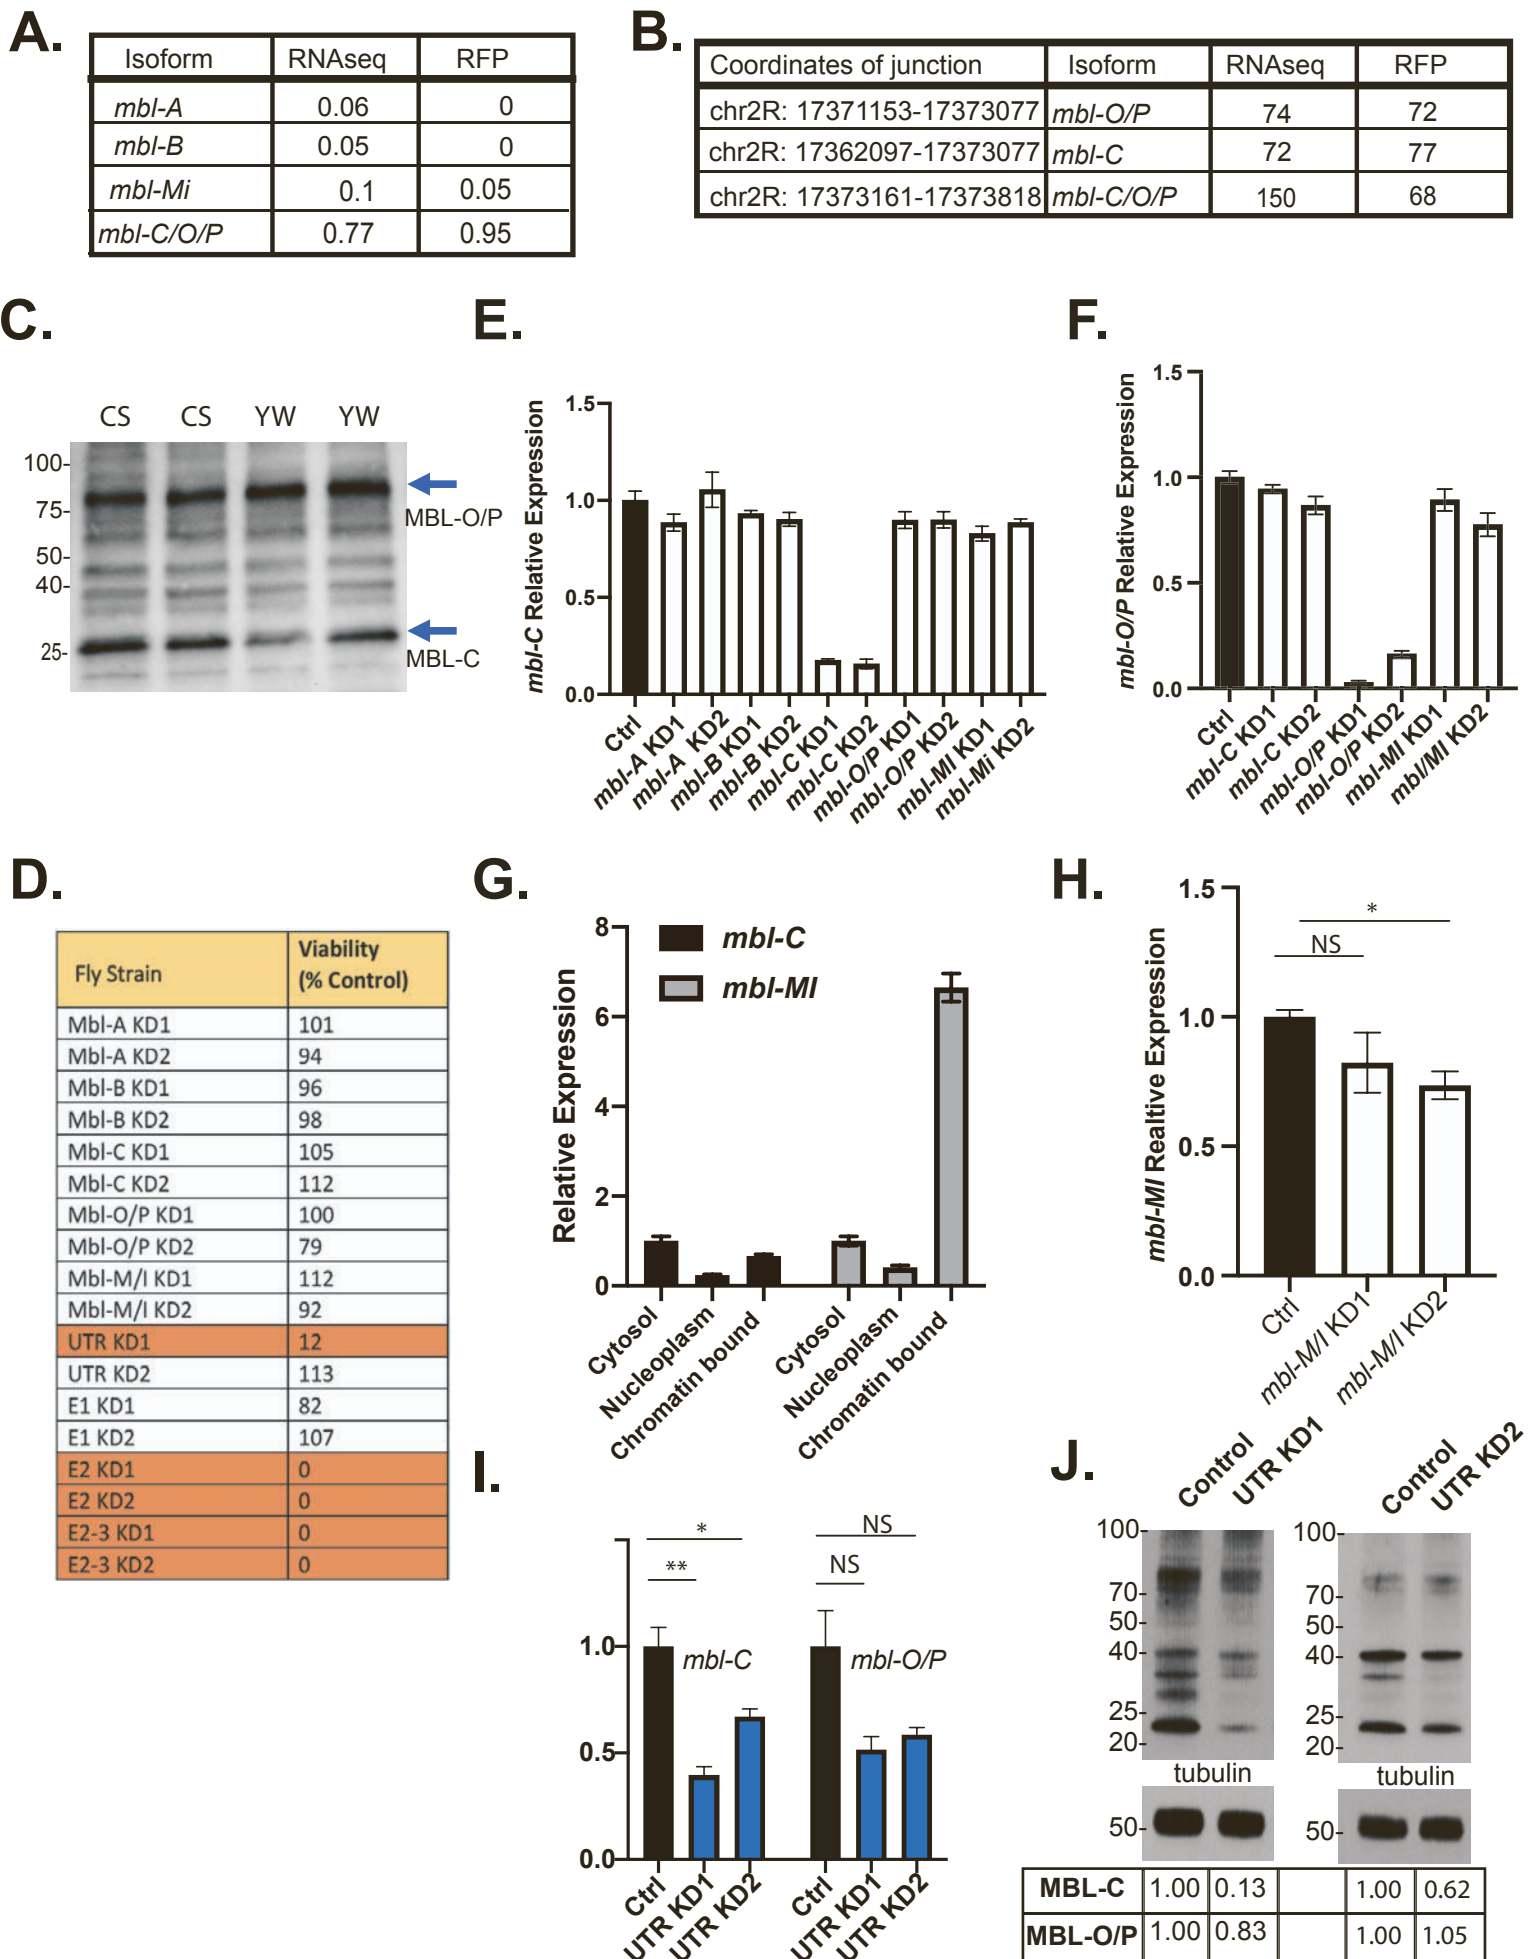

Figure S1.

**Figure S1 related to Figure 1: Mbl locus generates several RNA and protein isoforms and can be knockdown specifically using isoform specific shRNAs. A,** Proportion of reads aligning to each *mbl* 3'UTR normalized by length. **B.** Number of junction reads of *mbl-O/P* and/or *mbl-C* isoforms detected in RNA sequencing and RFP reads. **C.** Western blot analysis of fly heads extract from CS and YW flies with anti-MBL, tubulin is blotted as a loading control. **D.** Viability count for different *mbl* isoform KD lines % was plotted against control sibling flies. **E, F.** qRT-PCR evaluation of Relative *mbl-C* and *mbl-O/P* expression levels in different *mbl* isoform KD lines respectively. **G.** qRT-PCR evaluation of *mbl-C* and *mbl-M/I* expression levels at various cellular fractions from fly heads. **H.** qRT-PCR evaluation of *mbl-M/I* relative expression in *mbl-M/I* KD flies. **I.** qRT-PCR evaluation of Relative *mbl-C* and *mbl-O/P* expression levels in UTR KD lines respectively. **J.** Western blot analysis of fly heads extract from control and UTR KD flies with anti-Mbl, tubulin is blotted as a loading control. In all the qRT-PCR analysis tubulin was used as a normalization control (n = 3, error bars represent standard error of the mean, two-tailed t.test performed for significance difference (\*\*\*\*, p<0.0001, \*\*\*, p<0.0002, \*\*, p<0.0021, \*, p<0.0332)).

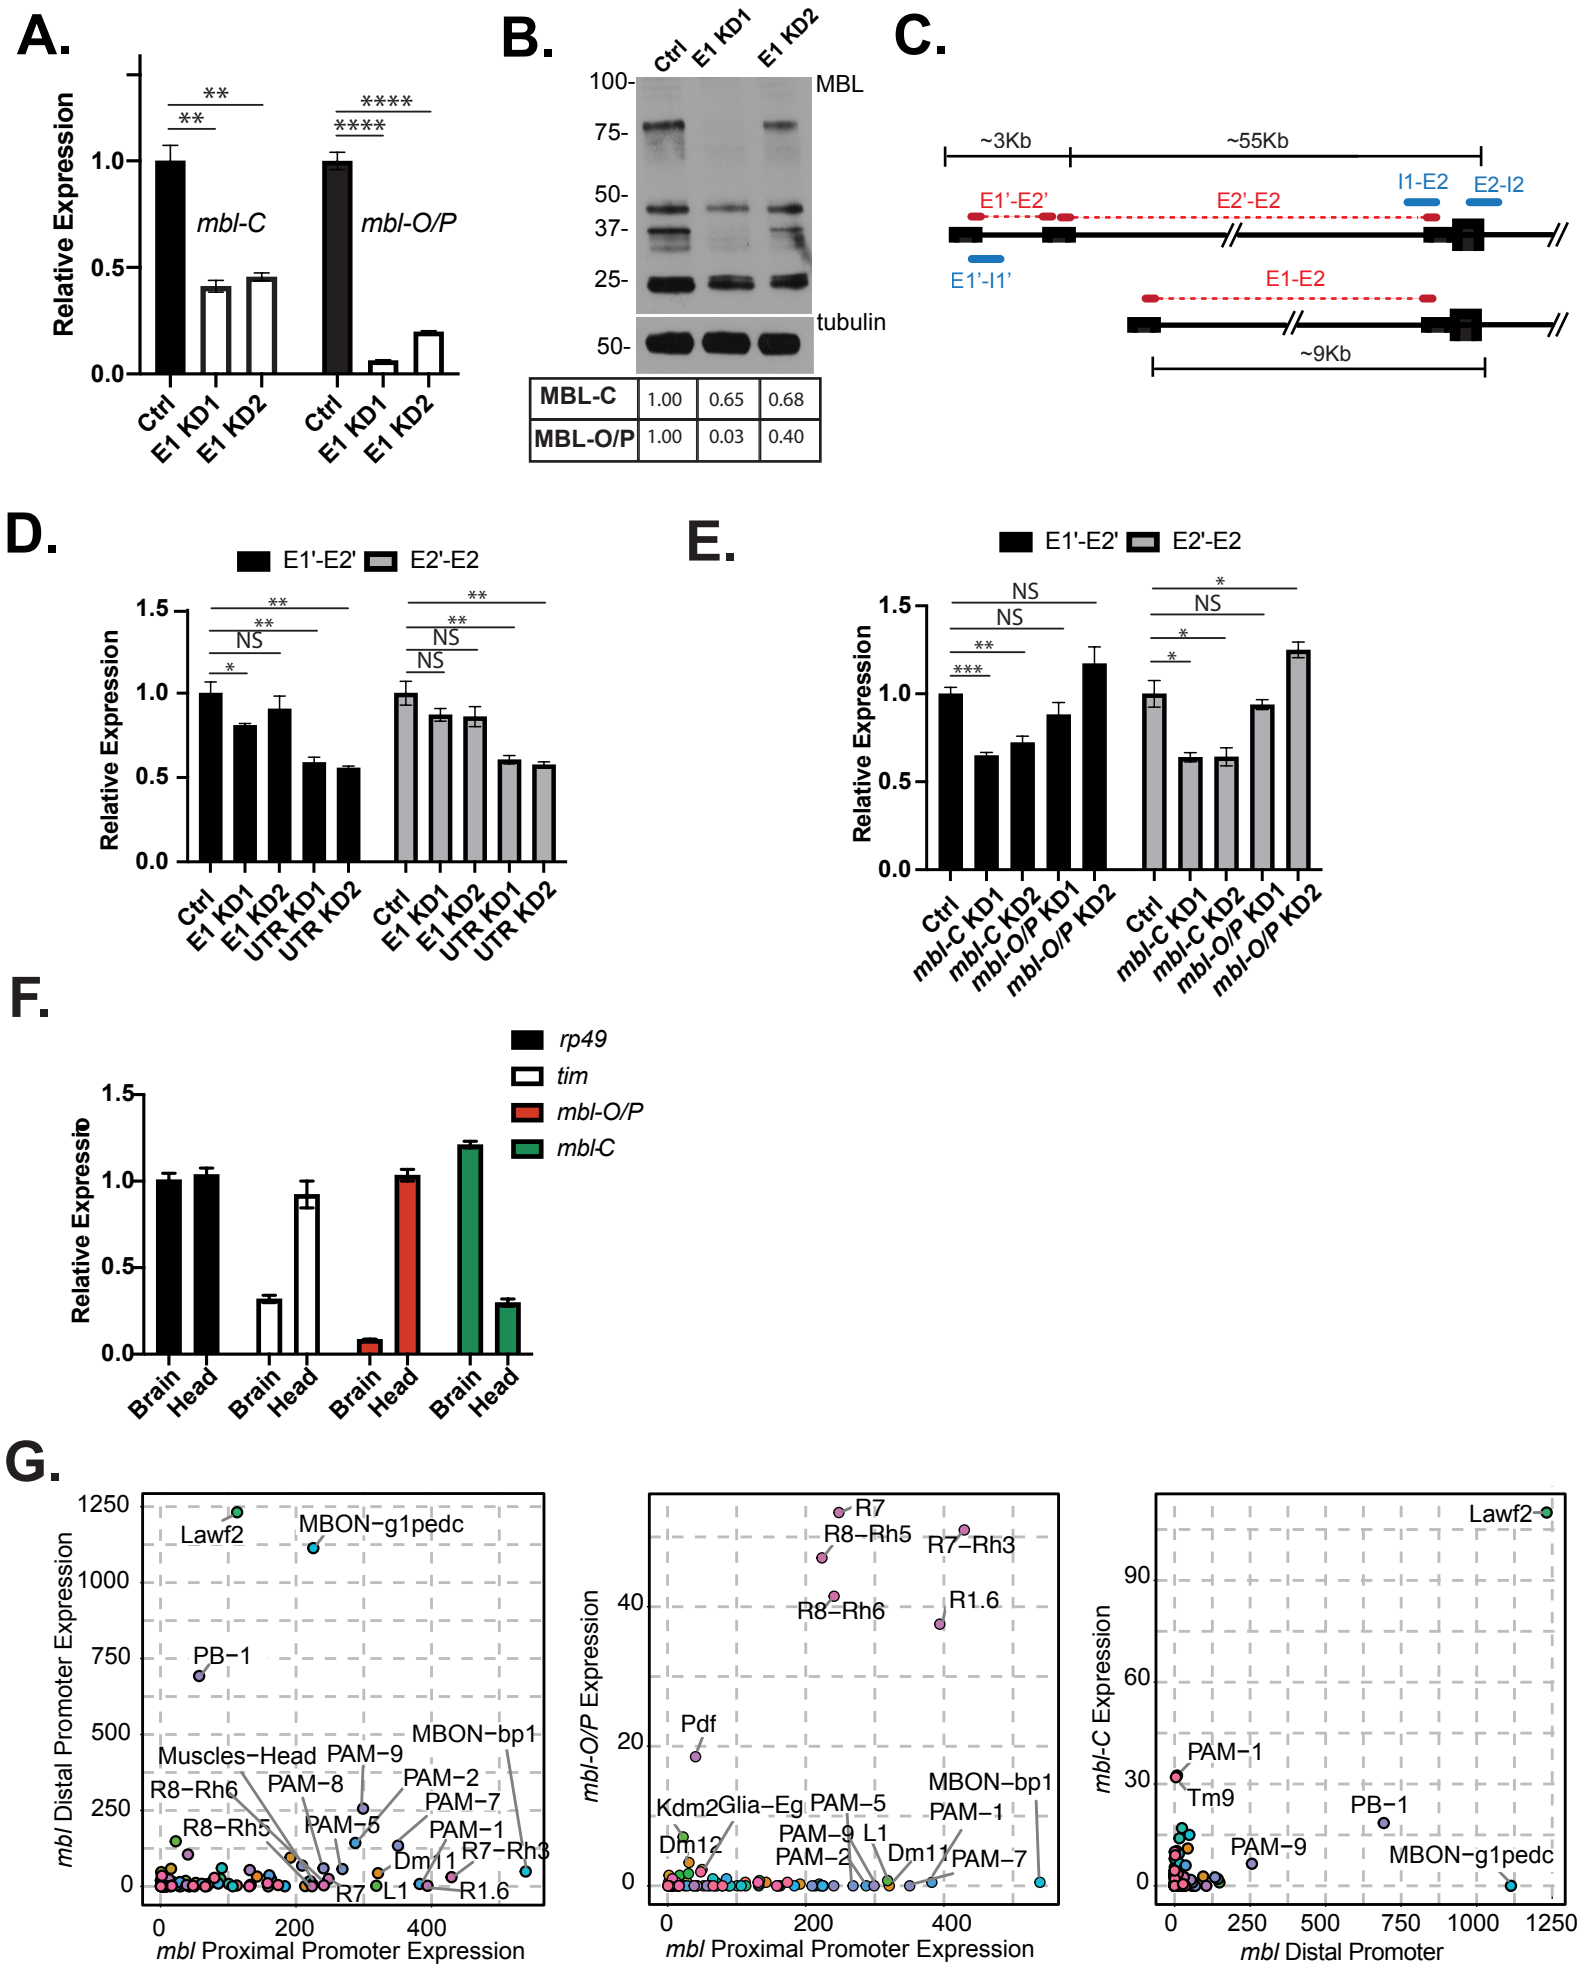

**Figure S2 related to Figure 1 and 2 : Mbl-C and O/P isoforms express in different cell types and use different promoters. A.** qRT-PCR evaluation of *mbl-C* and *mbl-O/P* expression levels in Exon1 KD lines. **B.** Western blot analysis of Exon1 KD flies blotted against MBL antibody, tubulin was used as loading control. **C.** Scheme for the upstream promoter and conventional promoter *mbl* transcript qPCR primers. **D, E.** qRT-PCR evaluation of Relative expression levels of transcripts from Upstream and conventional promoter of *mbl* locus in *mbl* Exon1, UTR KD flies and *mbl-C*, *mbl-O/P* KD fly heads respectively. **F.** qRT-PCR evaluation of *rp49*, *tim* and *mbl* isoforms expression levels in fly brain and head. **G. Left panel:** mean *mbl* distal vs proximal promoter splice junction signal. **Central panel:** mean *mbl-O/P* vs *mbl* proximal promoter splice junction signal. **Right panel:** mean *mbl-C* vs *mbl* distal promoter splice junction signal. In all the qRT-PCR analysis tubulin was used as a normalization control (n = 3, error bars represent standard error of the mean, two-tailed t.test performed for significance difference (\*\*\*\*, p<0.0001, \*\*\*, p<0.0002, \*\*, p<0.0021, \*, p<0.0332)).

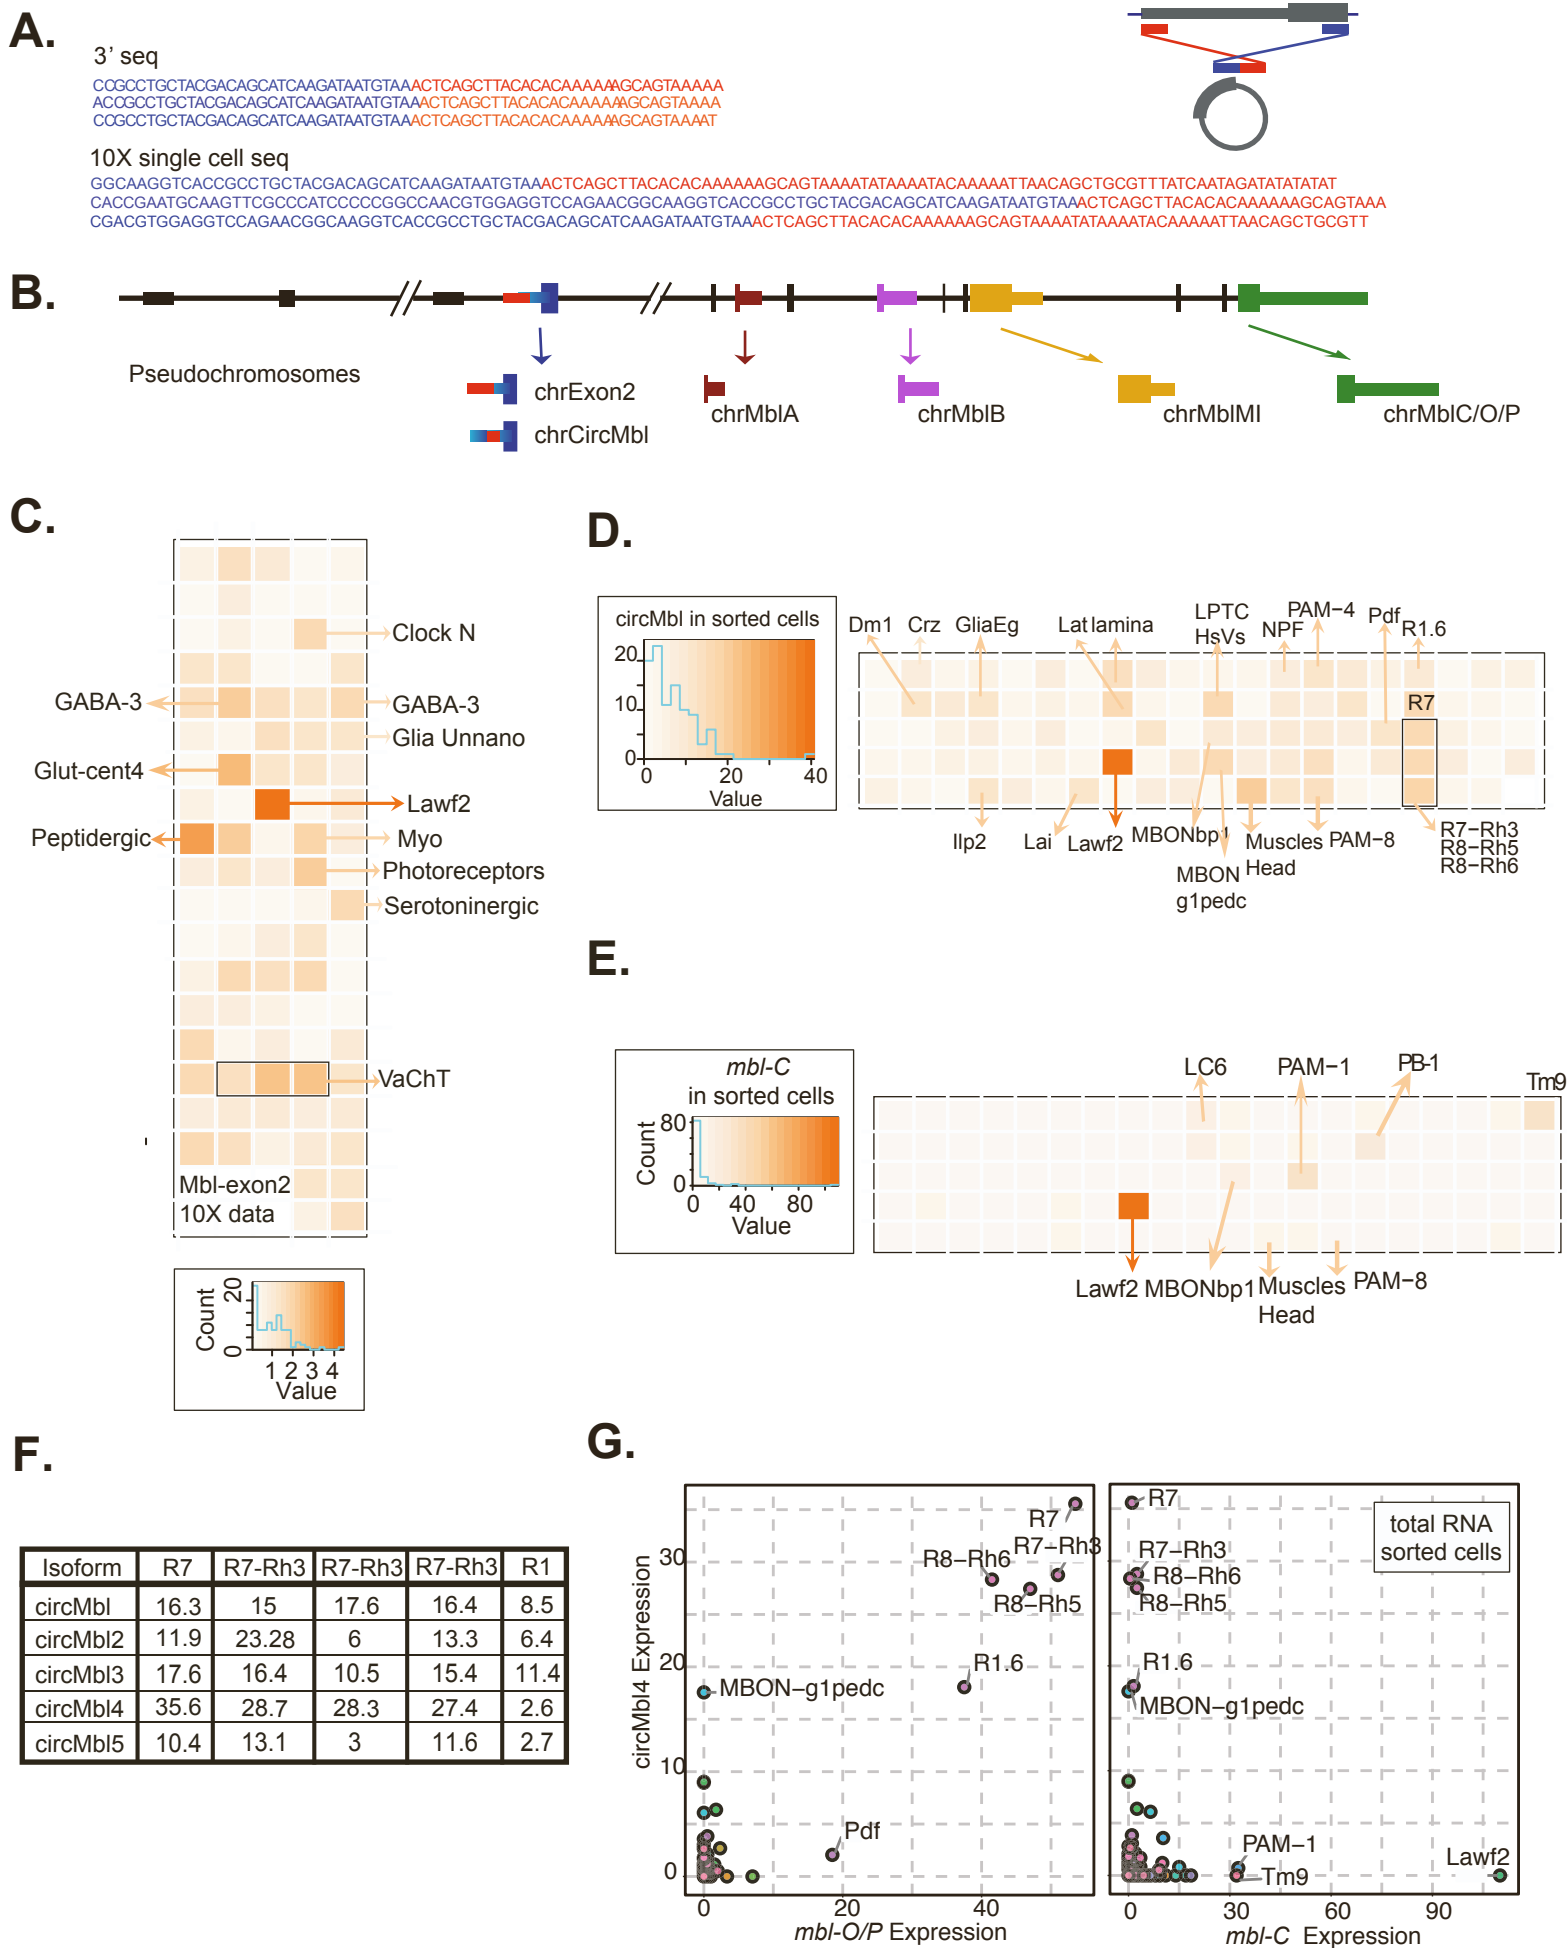

**Figure S3.**

**Figure S3 related to Figure 2: circMbl isoforms expression correlates with Mbl-C and Mbl-O/P isoforms expression in brain and photoreceptor cells.** **A.** Example of reads supporting circMbl back-splice junction in 3'seq and 10X single cell data. **B.** Representation of pseudo chromosomes used for single cell annotation of each *mbl* isoform. **C.** Heatmap representation of mean *mbl* exon 2 normalized expression in each single cell cluster. **D.** Heatmap representation of mean circMbl normalized expression in each sorted cell cluster. **E.** Heatmap representation of mean *mbl-C* normalized expression in each sorted cell cluster. **F.** Mean normalized reads of each circMbl isoform in different photoreceptor neurons TAPIN-seq total-RNA sequencing. **G.** Mean circMbl4 vs *mbl-O/P* splice junction signal by cell-type in TAPIN-seq total-RNA sequencing (left panel), Mean circMbl4 vs *mbl-C* splice junction signal by cell-type in TAPIN-seq total-RNA sequencing (right panel).



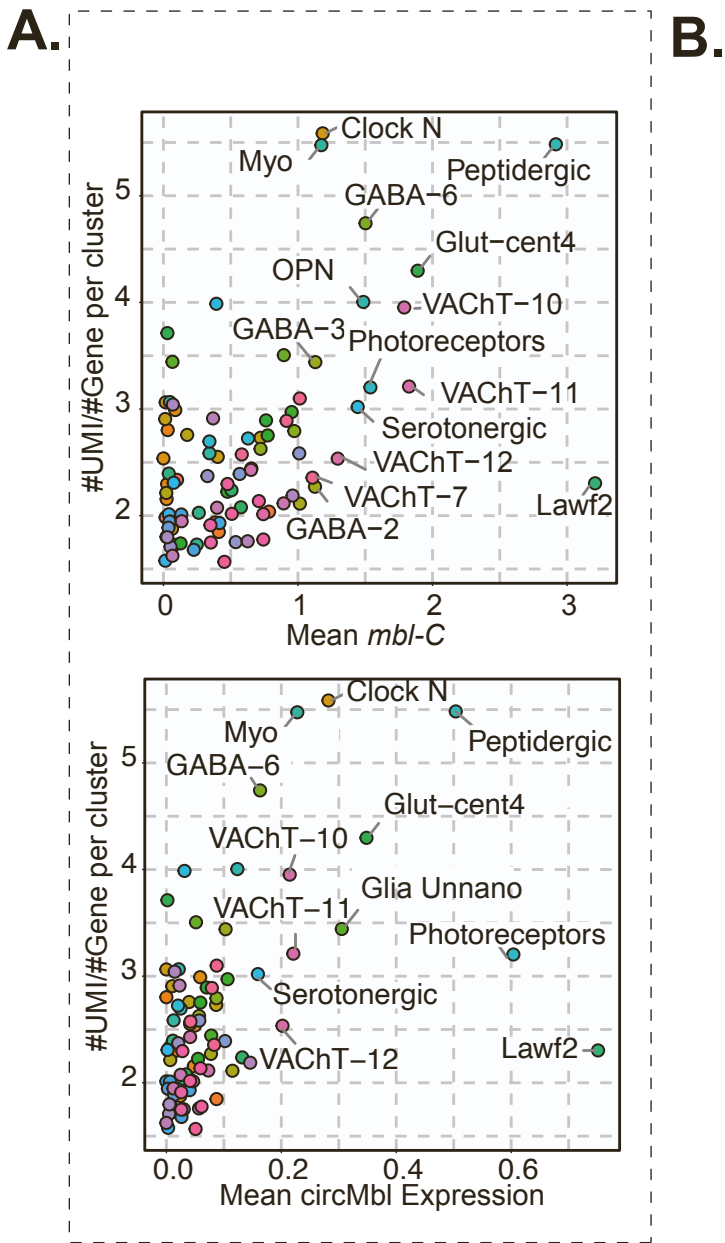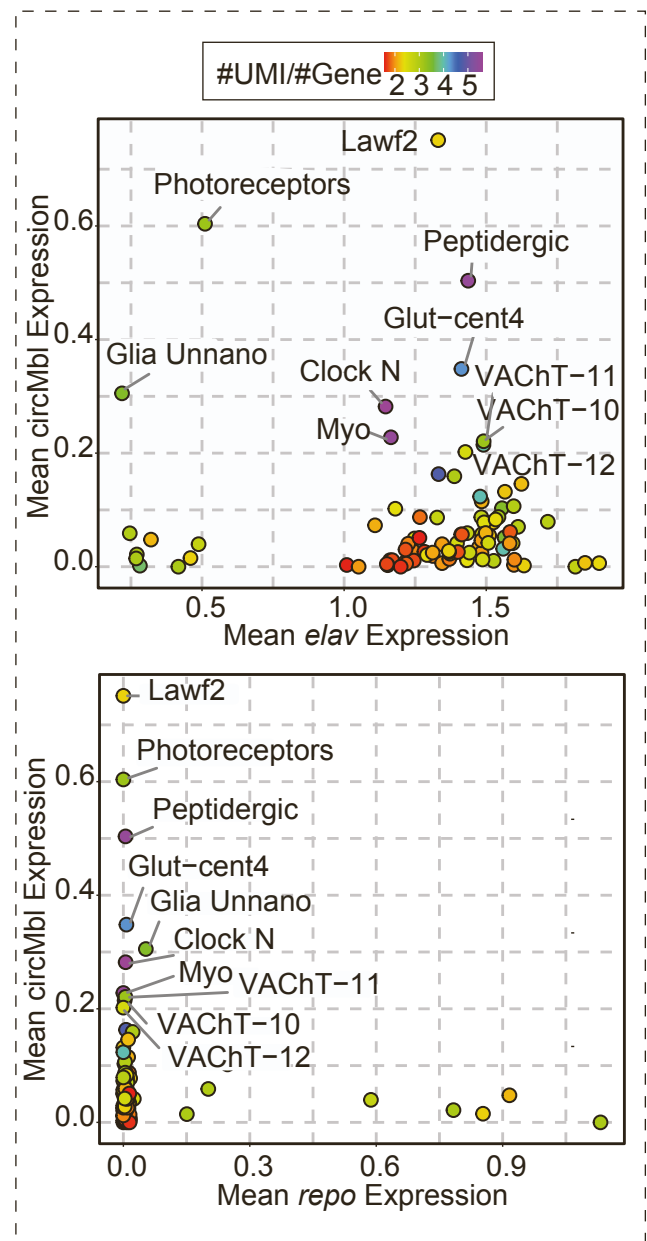

Figure S4.

**Figure S4 related to Figure 2: Analysis of circMbl in single cells data. A. Upper panel:** mean normalized *mbl-C* reads vs the ratio of UMIs/Genes detected in each single cell cluster. **Lower panel:** mean normalized circMbl reads vs the ratio of UMIs/Genes detected in each single cell cluster. **B** Mean normalized circMbl reads vs mean *elav* and *repo* reads (upper panel and lower panel respectively). Color represents the ration of UMIs/Genes detected in each single cell cluster.

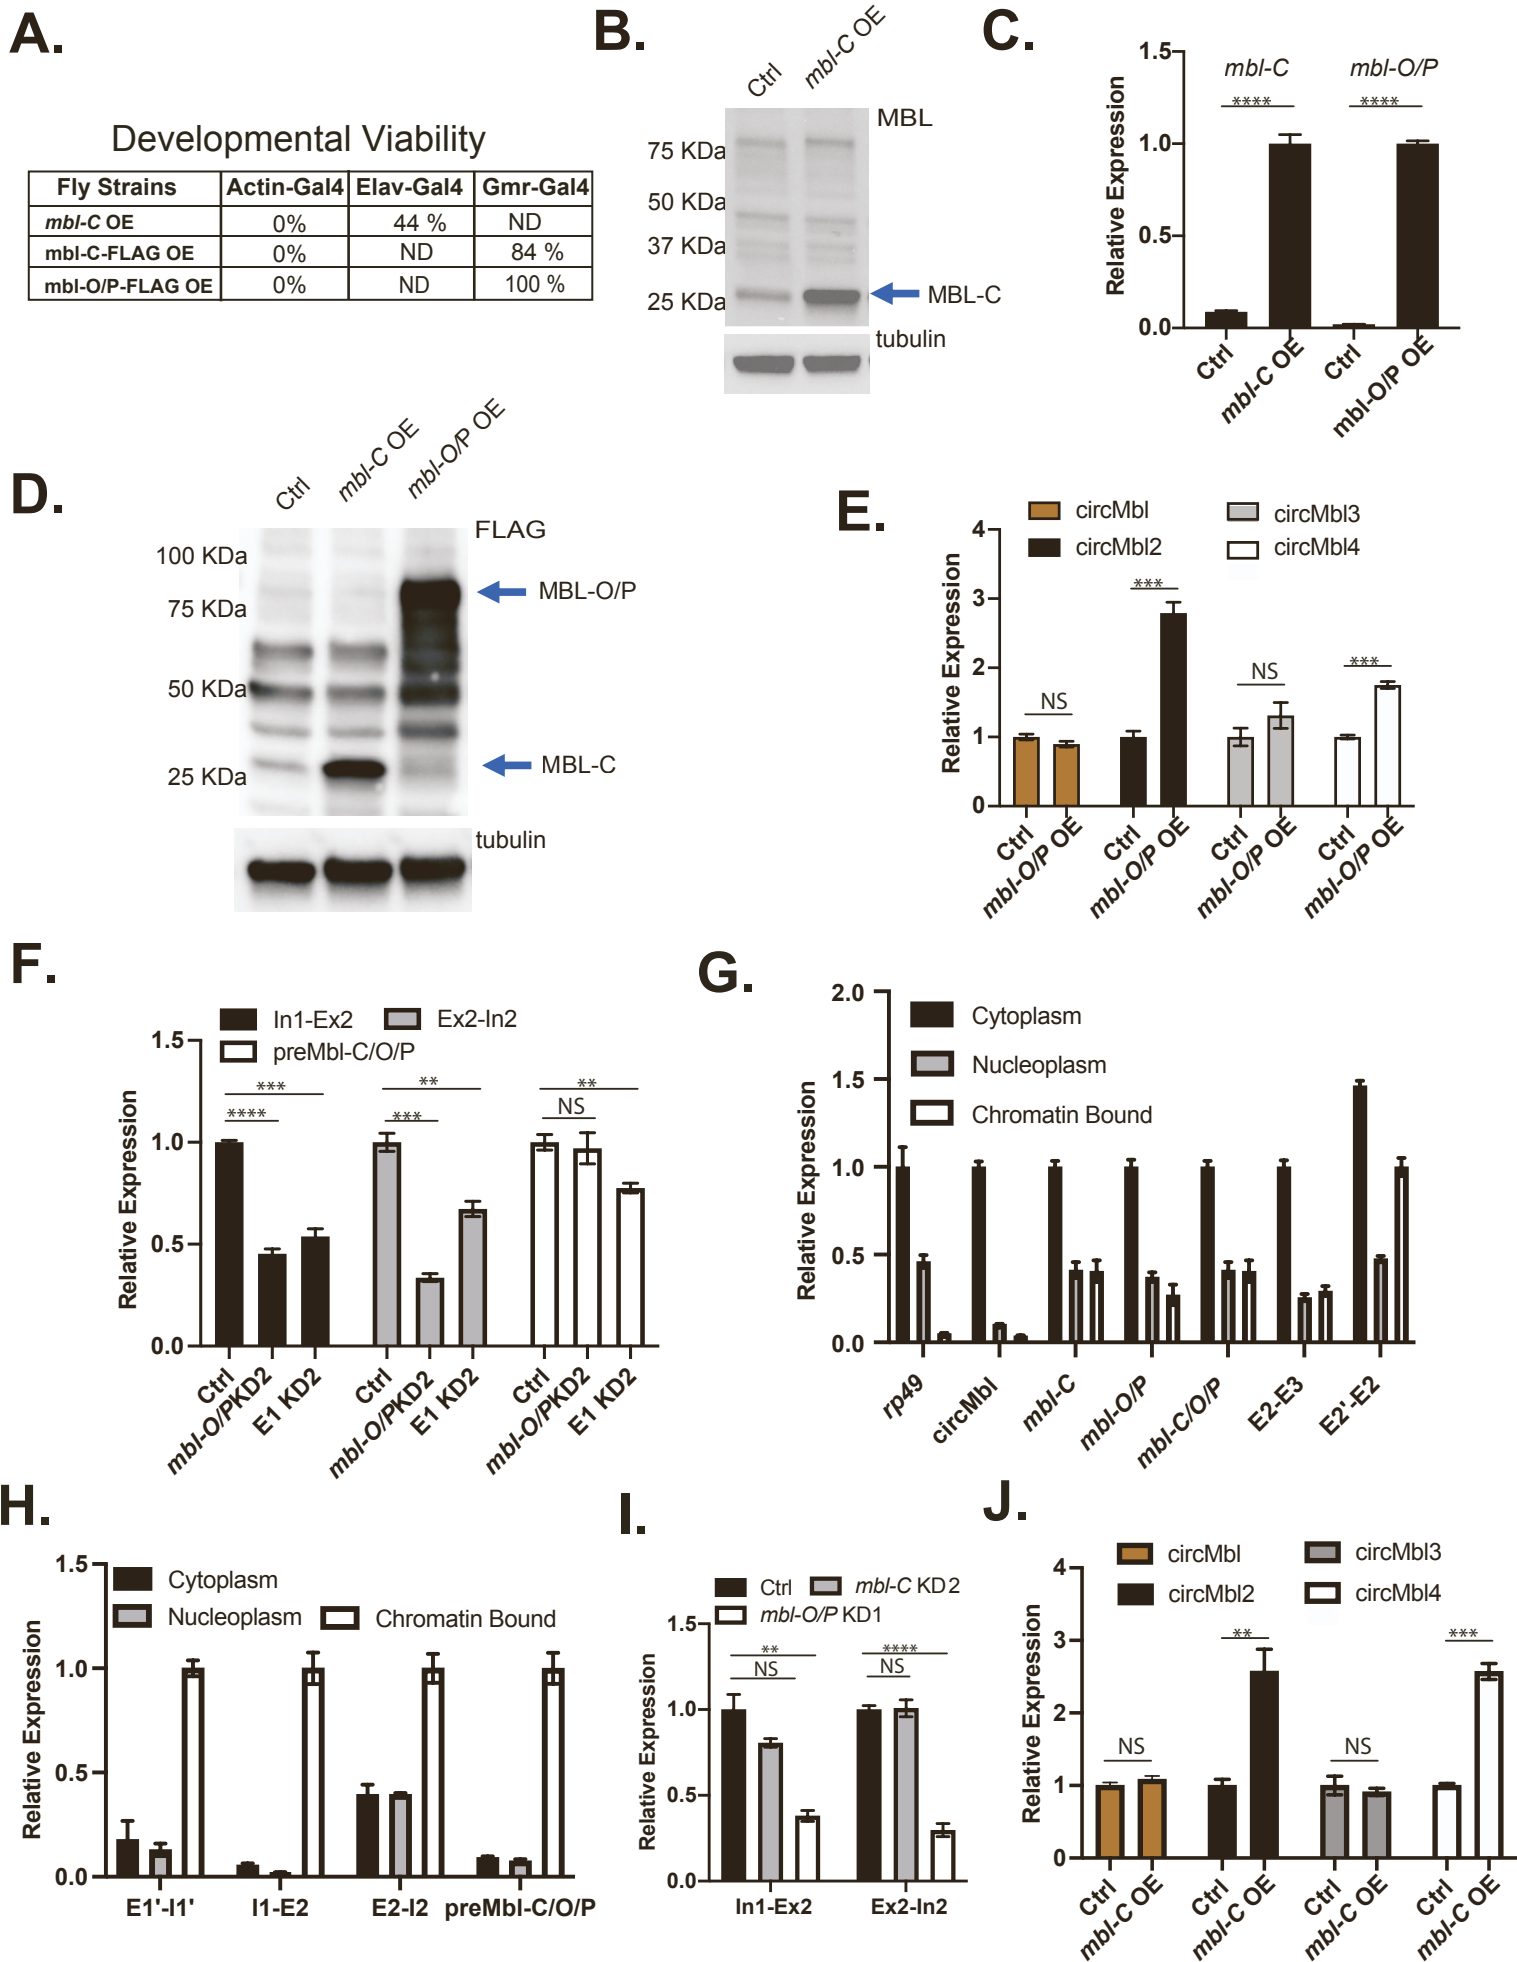

**Figure S5.**

**Figure S5 related to Figure 3 and 4: MBL isoforms regulates its own expression by producing different circMbl isoforms in different cell types. A.** Viability count for *mbl-C* and *O/P* isoform OE flies with different gal4 driver lines % was plotted against control sibling flies. **B.** Western blot image showing levels of Mbl-C in *mbl-C* OE fly heads, membrane was blotted using anti-MBL, tubulin is blotted as a loading control. **C.** qRT-PCR evaluation of the levels of *mbl-C* and *mbl-O/P* isoforms in FLAG tagged *mbl*-OE fly heads. **D.** Western blot image showing levels of MBL-C and MBL-O/P in FLAG tagged *mbl-C* and *O/P* OE lines fly heads, membrane was blotted using anti-FLAG, tubulin is blotted as a loading control. **E.** qRT-PCR evaluation of the levels of circMbl isoforms in *mbl-O/P* OE fly heads. **F.** qRT-PCR evaluation of the levels of pre-RNAs in *mbl-O/P*, and Exon1 KD fly heads. **G, and H.** qRT-PCR evaluation of chromatin bound, Nucleoplasm, and cytoplasm fractions RNA of *rp49* and *mbl* locus isoforms from control fly heads. **I.** qRT-PCR evaluation of chromatin bound In1-Ex2, Ex2-In2 levels in control, *mbl-C*, and *mbl-O/P* KD fly heads. **J.** qRT-PCR evaluation of the levels of circMbl isoforms in *mbl-C* OE fly heads. In all the qRT-PCR analysis tubulin was used as a normalization control (n = 3, error bars represent standard error of the mean, two-tailed t.test performed for significance difference (\*\*\*\*, p<0.0001, \*\*\*, p<0.0002, \*\*, p<0.0021, \*, p<0.0332)).

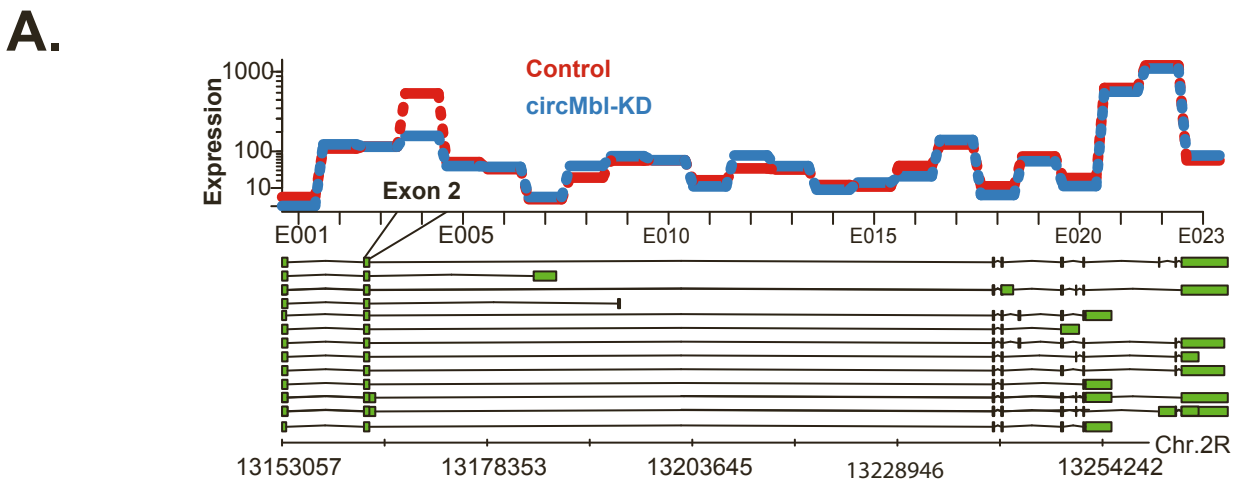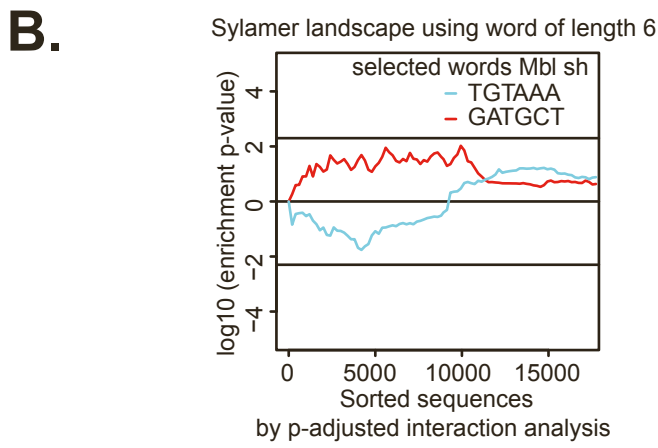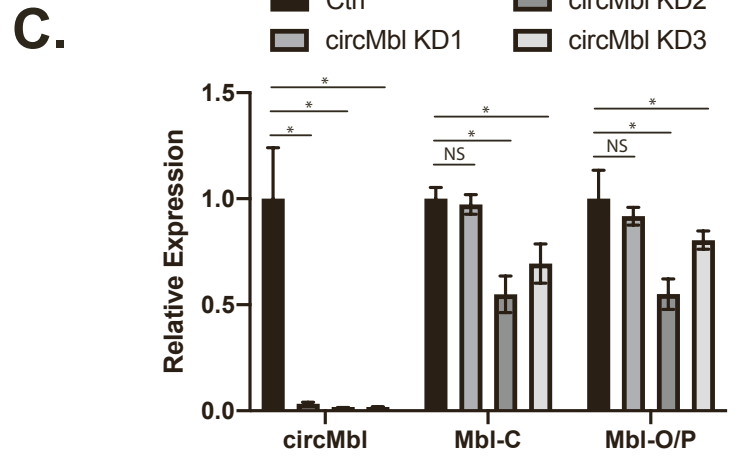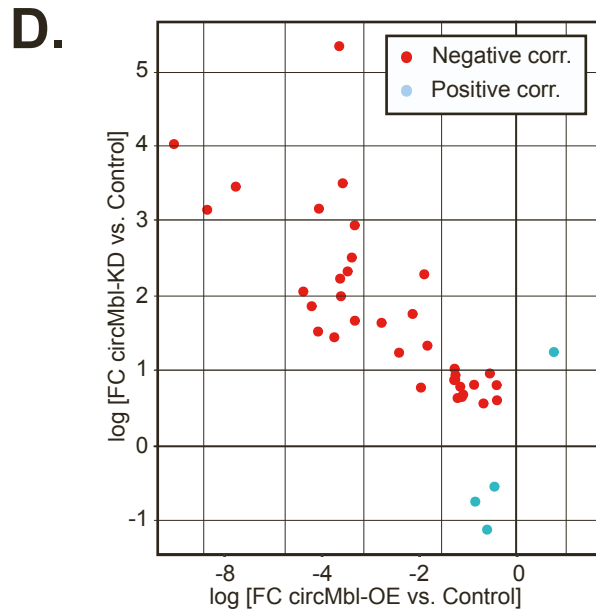

Figure S6.

**Figure S6 related to Figure 5 and 6: circMbl can be knockdown specifically using shRNAs targeting the circMbl junction.** **A.** The shRNA against circMbl does not affect alternative splicing/ other *mbl* isoforms expression. Data presented is differential exon usage analysis performed using DEXseq. **B.** Sylamer enrichment landscape plot for sh-circMbl and sh-circMbl\* 6mers. The x-axis represents the genes sorted from the most to the least enriched in the AGO-1 IP-seq. The y-axis shows the hypergeometric significance for each word at each leading bin. **C.** qRT-PCR evaluation of circMbl, *mbl-C* and *mbl-O/P* expression levels in circMbl KD lines. **D.** Fold changes (in log scales) between circMbl OE (x-axis) and circMbl-KD (y-axis) in comparison with their respective controls. Blue indicates genes showing positive correlation in both comparisons. In red, the genes showing negative correlation between the fold change in one comparison and the other. In all cases we considered genes with fold change > 1.5 and p-value<0.05. In all the qRT-PCR analysis tubulin was used as a normalization control (n = 3, error bars represent standard error of the mean, two-tailed t.test performed for significance difference (\*\*\*\*, p<0.0001, \*\*\*, p<0.0002, \*\*, p<0.0021, \*, p<0.0332)).

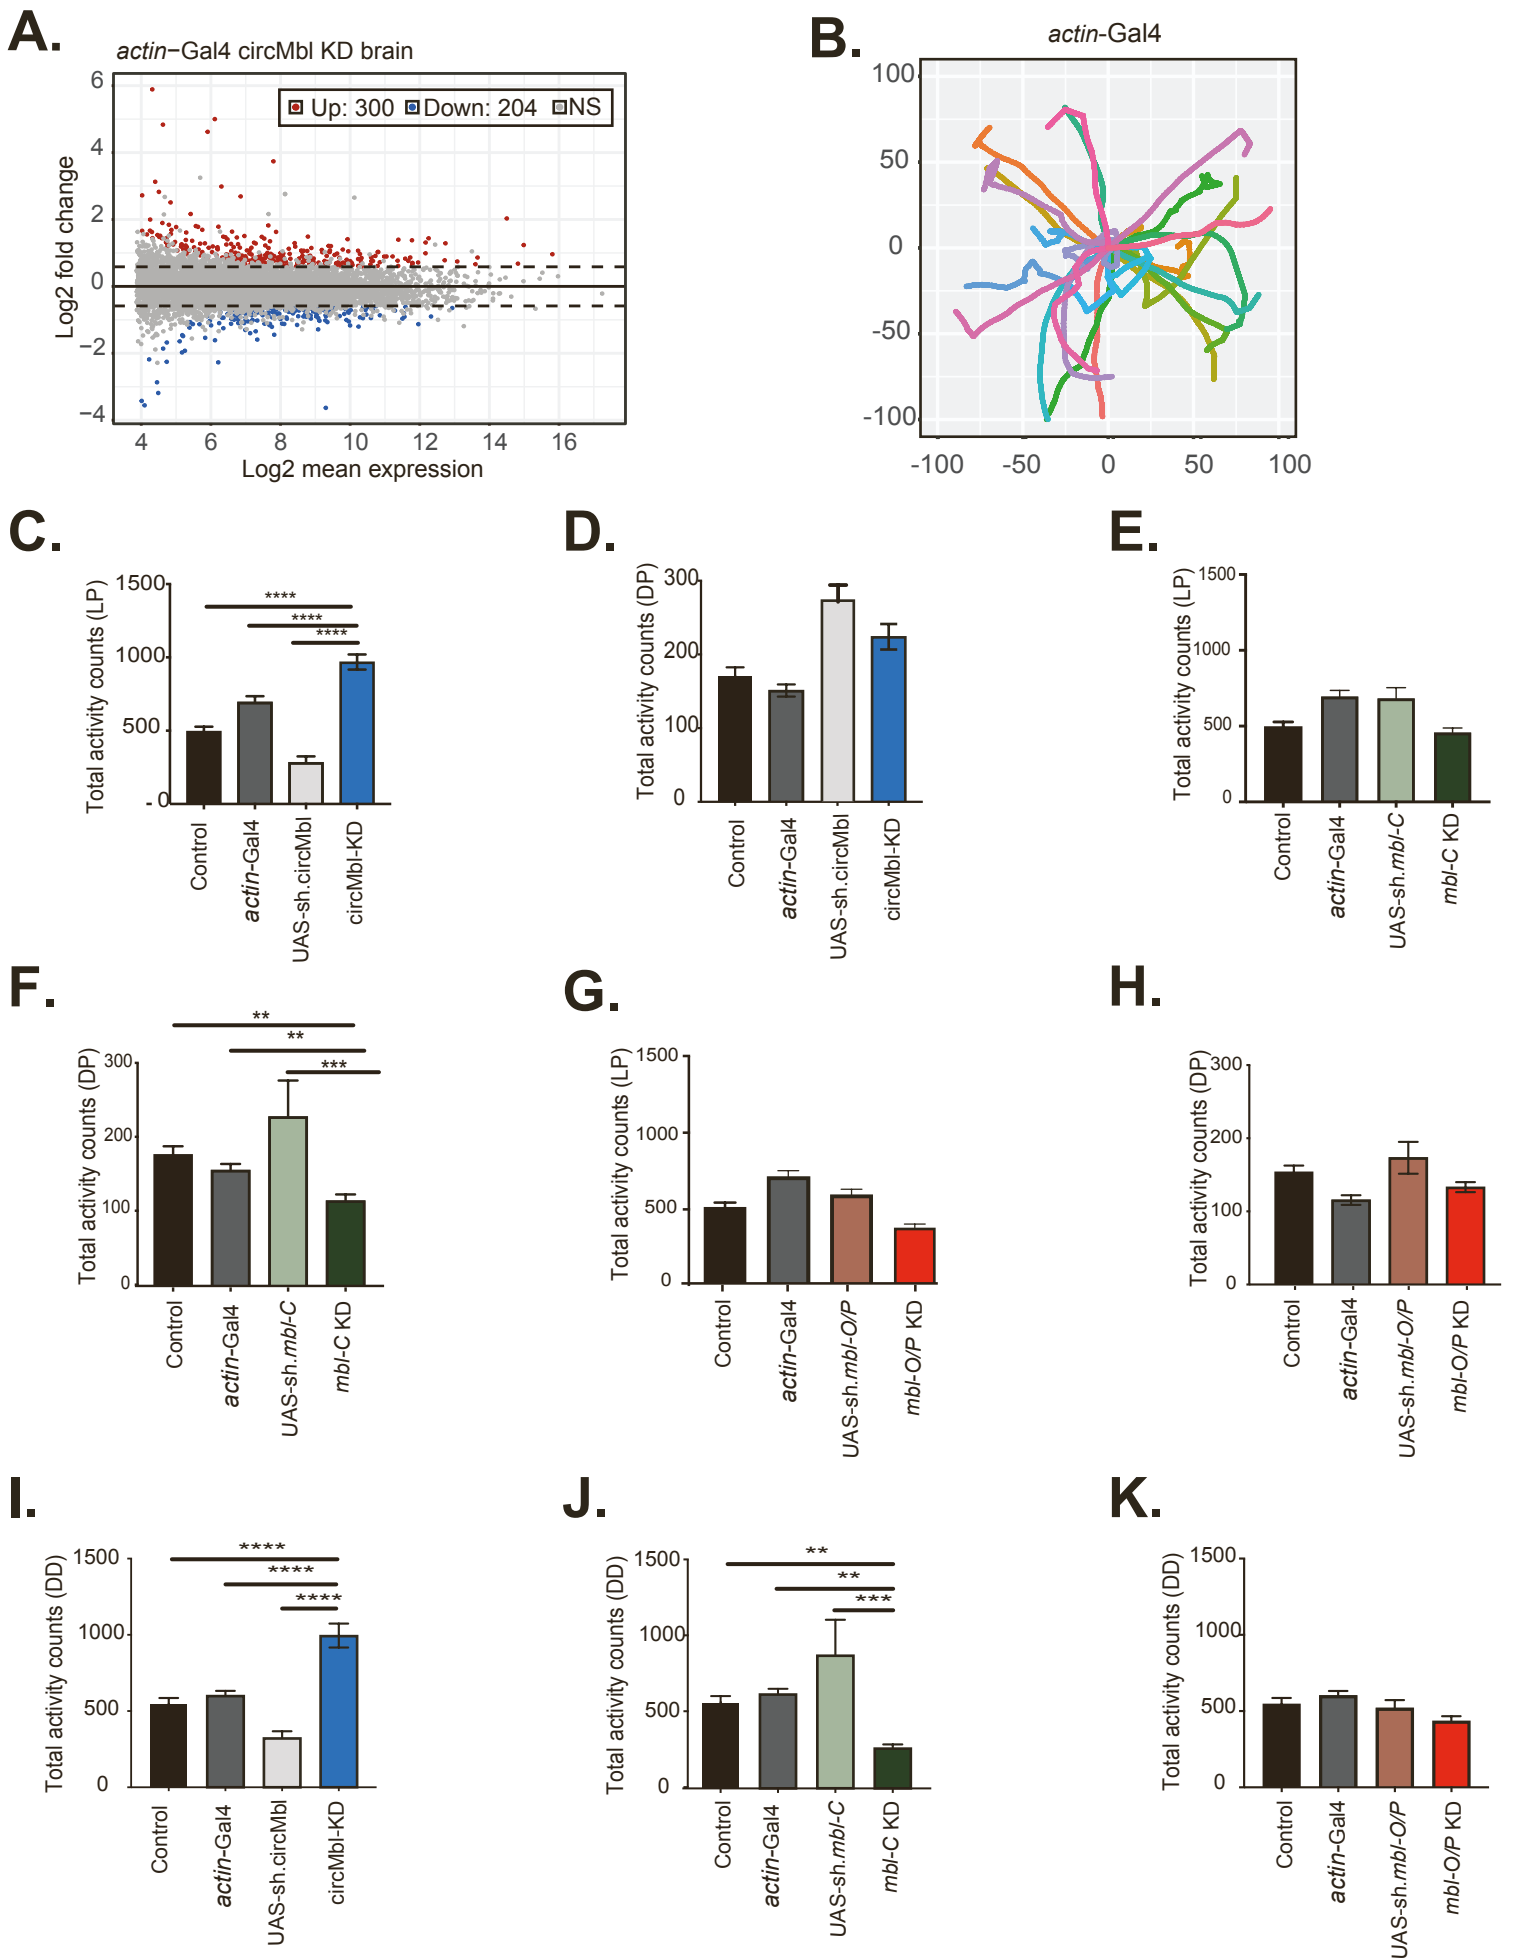

Figure S7

**Figure S7 related to Figure 7: circMbl KD leads to change in specific set of genes and behavior.**

**A.** MA plot showing gene expression differences in fly brains between control and *actin-Gal4:circMbl* KD flies. **B.** Graphical representation of path covered by 3<sup>rd</sup> instar *actin* Gal4 control larvae in larval assay. Each larvae is represented in a different color and X and Y axis indicate distance covered in mm. **C-F.** Quantification of total activity for ubiquitous knockdown of circMbl (n=120), and *mbl-C* (n=115) with corresponding 8MM, Gal4, and UAS controls, during the light period (LP) and dark period (DP) in 12:12 LD. **G-H.** Quantification of total activity for ubiquitous knockdown *mbl-O/P* (n=96) with corresponding 8MM, Gal4, and UAS controls, during the light period (LP) and dark period (DP) in 12:12 LD. **I-K.** Quantification of total activity over five days in complete darkness (DD). Stars represent statistical significance relative to 8MM and *actin-Gal4* controls calculated by one-way ANOVA using Tukey's multiple comparisons test (\*\*\*\*, p<0.0001, \*\*, p<0.005)
